# Supplementary material for: The basal twin of α-Cr2O3 nanocondensates: occurrence and first-principles calculations
Source: Royal Society of Chemistry journal article supplement (doi:10.1039/c3ce40514a), 2013-01-01

Atoms disposition of the  $\alpha$ -Cr<sub>2</sub>O<sub>3</sub> unit cell with the Cr<sub>12</sub>O<sub>18</sub> formula in (a) perspective view; (b) top view of the basal plane and (c) side view along the  $[\bar{1}\bar{1}0]$  direction displayed in ball and stick (left) and polyhedron style (right). Oxygen (red) and Cr (bluish for A-configurations and greenish for B-configurations) atoms as labeled in the unit cell are in the stacking sequence A<sup>0</sup>B<sup>1</sup>A<sup>2</sup>B<sup>0</sup>A<sup>1</sup>B<sup>2</sup> (cf. text).

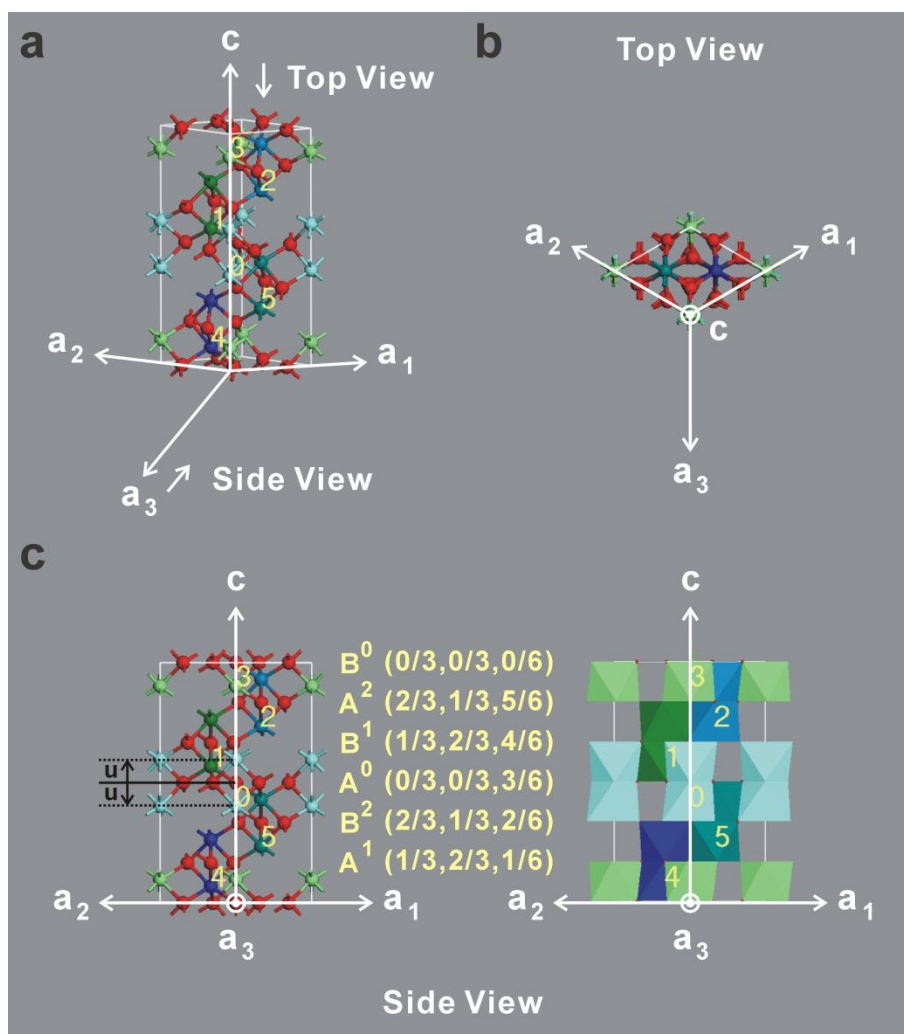

Supplement: c3ce40514a.pdf [file c3ce40514a.pdf]
